# Supplementary material for: Predicting pyrolysis decomposition of PFOA using computational nanoreactors: a thermodynamic study
Source: Royal Society of Chemistry journal article supplement (doi:10.1039/d3ra05187k), 2023-01-01
Supplement: d3ra05187k1.pdf [file d3ra05187k1.pdf]

**Supporting Information for:**

***Predicting Pyrolysis Decomposition of PFOA using Computational Nanoreactors: A Thermodynamic Study***

Elizabeth Serna-Sanchez and Steven Pellizzeri\*

Department of Chemistry and Biochemistry, Eastern Illinois University, 600 Lincoln Avenue, Charleston, IL 61920, USA. Email: [spellizzeri@eiu.edu](mailto:spellizzeri@eiu.edu)

List of contents

|                                                                                                                                                                                                      |    |
|------------------------------------------------------------------------------------------------------------------------------------------------------------------------------------------------------|----|
| Table S1. Observations with change in $k_{\text{push}}$ .....                                                                                                                                        | S2 |
| Table S2. Observations with change in $\alpha$ .....                                                                                                                                                 | S2 |
| Table S3. Observations of change of $k_{\text{push}}$ and $\alpha$ . .....                                                                                                                           | S3 |
| Table S4. Observations of the decomposition species within the nanoreactor. ....                                                                                                                     | S3 |
| Table S5. Total $\Delta G$ values ( $\text{kJ}\cdot\text{mol}^{-1}$ ) of the reaction at different temperatures. ....                                                                                | S4 |
| Table S6. Total $\Delta G$ values ( $\text{kJ}\cdot\text{mol}^{-1}$ ) of the recombination of $\text{CF}_3$ and $\text{C}_2\text{F}_3$ to form $\text{C}_3\text{F}_6$ at different temperatures..... | S4 |

| Temperature (K) | $k_{\text{push}}$ | $\alpha$ | Observations                                                                                                            |
|-----------------|-------------------|----------|-------------------------------------------------------------------------------------------------------------------------|
| 298.15          | 0.04              | 0.7      | Sporadic movement                                                                                                       |
| 1000            | 0.04              | 0.7      | Sporadic movement with occasional bond breakage and reformation                                                         |
| 1000            | 0.05              | 0.7      | Sporadic movement with occasional bond breakage and reformation<br>Rotation from carboxyl group                         |
| 1300            | 0.04              | 0.7      | Sporadic movement                                                                                                       |
| 1300            | 0.08              | 0.7      | Sporadic movement with occasional bond breakage and reformation                                                         |
| 1300            | 0.08              | 0.7      | Sporadic movement with occasional bond breakage and reformation                                                         |
| 1300            | 0.12              | 0.7      | Sporadic movement with occasional bond breakage and reformation<br>The hydrogen interacted with the fluorine's          |
| 1300            | 0.2               | 0.7      | The molecule curls onto itself. The carboxyl group disconnects more often, and the hydrogen interacts with the fluorine |
| 1300            | 0.4               | 0.7      | Simulation failure                                                                                                      |

**Table S1.** Observations with change in  $k_{\text{push}}$ .

**Table S2.** Observations with change in  $\alpha$ .

| Temperature (K) | $k_{\text{push}}$ | $\alpha$ | Observations                                                    |
|-----------------|-------------------|----------|-----------------------------------------------------------------|
| 1300            | 0.2               | 1        | Sporadic movement with occasional bond breakage and reformation |
| 1300            | 0.2               | 1.2      | Sporadic movement with occasional bond breakage and reformation |
| 1300            | 0.2               | 1.4      | Sporadic movement with occasional bond breakage and reformation |
| 1300            | 0.2               | 1.6      | Sporadic movement with occasional bond breakage and reformation |

**Table S3.** Observations of change of  $k_{\text{push}}$  and  $\alpha$ .

| Temperature (K) | $k_{\text{push}}$ | $\alpha$ | Observations                                                                                                                                             |
|-----------------|-------------------|----------|----------------------------------------------------------------------------------------------------------------------------------------------------------|
| 1300            | 0.3               | 1.4      | Sporadic movement with occasional bond breakage and reformation                                                                                          |
| 1300            | 0.4               | 1.4      | $\text{C}_3\text{F}_4\text{O}_2\text{H}$ broke off and separated into $\text{CO}_2\text{H}$ and $\text{C}_2\text{F}_4$<br>Resulted in simulation failure |
| 1300            | 0.5               | 1.4      | Simulation failure                                                                                                                                       |
| 1300            | 0.5               | 1.6      | $\text{CO}_2$ broke off, the hydrogen first attached to a F and then the carbon creating $\text{C}_7\text{F}_{15}\text{H}$                               |
| 1300            | 0.4               | 1.6      | $\text{CO}_2$ and HF broke off                                                                                                                           |

**Table S4.** Observations of the decomposition species within the nanoreactor.

| Species                                     | Temperature (K) | $k_{\text{push}}$ | $\alpha$ | Observations                                                                                                                                                                   |
|---------------------------------------------|-----------------|-------------------|----------|--------------------------------------------------------------------------------------------------------------------------------------------------------------------------------|
| $\text{C}_8\text{F}_{15}\text{O}_2\text{H}$ | 1300            | 0.4               | 1.6      | Split into $\text{CO}_2$ and $\text{C}_2\text{F}_4$                                                                                                                            |
| $\text{C}_7\text{F}_{14}$                   | 1300            | 0.4               | 1.6      | Temporarily split into $\text{C}_3\text{F}_5$ and $\text{C}_4\text{F}_9$ and reformed into $\text{C}_7\text{F}_{14}$<br>Split into $\text{CF}_3$ and $\text{C}_6\text{F}_{11}$ |
| $\text{C}_6\text{F}_{11}$                   | 1300            | 0.4               | 1.6      | $\text{C}_2\text{F}_4$ detached within the first few moments and there is $\text{C}_4\text{F}_7$                                                                               |
| $\text{C}_4\text{F}_7$                      | 1300            | 0.4               | 1.6      | Simulation failure                                                                                                                                                             |
|                                             | 1300            | 0.4               | 1.9      | Simulation failure                                                                                                                                                             |
|                                             | 1300            | 0.4               | 2.2      | Simulation failure                                                                                                                                                             |
|                                             | 1300            | 0.4               | 1.6      | Simulation failure                                                                                                                                                             |
|                                             | 1300            | 0.2               | 1.6      | Split into $\text{C}_2\text{F}_3$ and $\text{C}_2\text{F}_4$                                                                                                                   |
| $\text{C}_2\text{F}_4$                      | 1300            | 0.2               | 1.6      | Splits into 2 $\text{CF}_2$ and reformed into $\text{C}_2\text{F}_4$ and shortly after resulting in a simulation failure                                                       |

**Table S5.** Total  $\Delta G$  values ( $\text{kJ}\cdot\text{mol}^{-1}$ ) of the reaction at different temperatures.

| Temperature<br>(K) | $\text{C}_8\text{F}_{15}\text{O}_2\text{H}$ | $\text{C}_7\text{F}_{14} + \text{CO}_2 +$<br>HF | $\text{C}_6\text{F}_{11} + \text{CF}_3 +$<br>HF + $\text{CO}_2$ | $\text{C}_4\text{F}_7 + \text{C}_2\text{F}_4 +$<br>$\text{CF}_3 + \text{CO}_2 + \text{HF}$ | $\text{C}_2\text{F}_3 + 2 \text{C}_2\text{F}_4 +$<br>$\text{CF}_3 + \text{CO}_2 + \text{HF}$ |
|--------------------|---------------------------------------------|-------------------------------------------------|-----------------------------------------------------------------|--------------------------------------------------------------------------------------------|----------------------------------------------------------------------------------------------|
| 298                | 0                                           | 186.44                                          | 287.23                                                          | 397.56                                                                                     | 580.66                                                                                       |
| 398                | 0                                           | 150.96                                          | 232.04                                                          | 320.95                                                                                     | 484.59                                                                                       |
| 498                | 0                                           | 115.31                                          | 176.73                                                          | 244.30                                                                                     | 388.48                                                                                       |
| 598                | 0                                           | 79.66                                           | 121.59                                                          | 167.86                                                                                     | 292.63                                                                                       |
| 698                | 0                                           | 44.10                                           | 66.69                                                           | 91.71                                                                                      | 197.15                                                                                       |
| 798                | 0                                           | 8.70                                            | 12.01                                                           | 15.94                                                                                      | 102.09                                                                                       |
| 898                | 0                                           | -26.53                                          | -42.38                                                          | -59.50                                                                                     | 7.45                                                                                         |
| 998                | 0                                           | -61.63                                          | -96.52                                                          | -134.56                                                                                    | -86.73                                                                                       |
| 1098               | 0                                           | -96.52                                          | -150.41                                                         | -209.24                                                                                    | -180.54                                                                                      |
| 1198               | 0                                           | -131.29                                         | -204.10                                                         | -283.68                                                                                    | -273.93                                                                                      |
| 1298               | 0                                           | -165.90                                         | -257.48                                                         | -357.77                                                                                    | -366.94                                                                                      |

**Table S6.** Total  $\Delta G$  values ( $\text{kJ}\cdot\text{mol}^{-1}$ ) of the recombination of  $\text{CF}_3$  and  $\text{C}_2\text{F}_3$  to form  $\text{C}_3\text{F}_6$  at different temperatures.

| Temperature<br>(K) | $\text{C}_3\text{F}_6$ |
|--------------------|------------------------|
| 298                | -404.86                |
| 398                | -385.82                |
| 498                | -366.84                |
| 598                | -347.93                |
| 698                | -329.11                |
| 798                | -310.39                |
| 898                | -291.76                |
| 998                | -273.22                |
| 1098               | -254.76                |
| 1198               | -236.38                |
| 1298               | -218.08                |
